# Supplementary material
Source: PubMed Central journal article supplement (PMC4011907)
Supplement: mabs-6-628-s01.pdf [file mabs-6-628-s01.pdf]

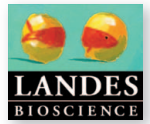

**Supplemental Material to:**

**Sreekumar Kodangattil, Christine Huard, Cindy Ross, Jian Li, Huilan Gao, Alessandro Mascioni, Santosh Hodawadekar, Snehal Naik, Jessica Min-debartolo, Alberto Visintin, and Juan C Almagro**

**The functional repertoire of rabbit antibodies and antibody discovery via next-generation sequencing**

**2014; mAbs 6(3)**

**<http://dx.doi.org/10.4161/mabs.28059>**

**<https://www.landesbioscience.com/journals/mabs/article/28059/>**

**Table 1.** Roche/454 sequencing statistics.

A. Number and average length of sequence reads that satisfied the QC metrics as described in Material and Methods.

| Source    | VH              |                | VK              |                |
|-----------|-----------------|----------------|-----------------|----------------|
|           | Number of reads | Average Length | Number of Reads | Average Length |
| <b>BM</b> | 235,336         | 411            | 28,874          | 375            |
| <b>SP</b> | 289,888         | 409            | 44,039          | 375            |
| <b>IM</b> | 286,904         | 405            | 29,763          | 376            |

B. Number of unique protein sequences without frameshifts and at least as long as their corresponding germline V gene segment. These data sets were used to estimate the diversity of the repertoire and calculate the somatic mutations.

| Source    | VH      |         |     | VK     |        |     |
|-----------|---------|---------|-----|--------|--------|-----|
|           | Total   | Unique  | %   | Total  | Unique | %   |
| <b>BM</b> | 224,535 | 163,795 | 73% | 24,544 | 19,550 | 80% |
| <b>SP</b> | 267,364 | 219,237 | 82% | 37,813 | 31,763 | 84% |
| <b>IM</b> | 264,437 | 171,815 | 65% | 25,452 | 18,767 | 74% |

**Table 2.** Germline genes used in the IGVH/K and IGJH/K assignment. The nomenclature and sequences are reported in IMGT (<http://www.imgt.org/>)

**IGVH:**

IGHV1S33\*01, IGHV1S34\*01, IGHV1S36\*01, IGHV1S40\*01, IGHV1S43\*01, IGHV1S44\*01, IGHV1S45\*01,  
IGHV1S47\*01, IGHV1S49\*01, IGHV1S50\*01, IGHV1S51\*01, IGHV1S52\*01, IGHV1S53\*01, IGHV1S54\*01,  
IGHV1S55\*01, IGHV1S56\*01, IGHV1S57\*01, IGHV1S58\*01, IGHV1S59\*01, IGHV1S60\*01, IGHV1S61\*01,  
IGHV1S62\*01, IGHV1S63\*01, IGHV1S64\*01, IGHV1S65\*01, IGHV1S66\*01, IGHV1S67\*01, IGHV1S68\*01,  
IGHV1S69\*01, IGHV1S7\*01,  
IGHV1S8\*01

**IGVK:**

IGKV1S1\*01, IGKV1S10\*01, IGKV1S11\*01, IGKV1S12\*01, IGKV1S14\*01, IGKV1S15\*01, IGKV1S16\*01,  
IGKV1S17\*01, IGKV1S18\*01, IGKV1S19\*01, IGKV1S2\*01, IGKV1S20\*01, IGKV1S21\*01, IGKV1S22\*01,  
IGKV1S23\*01, IGKV1S24\*01, IGKV1S25\*01, IGKV1S26\*01, IGKV1S27\*01, IGKV1S28\*01, IGKV1S29\*01,  
IGKV1S3\*01, IGKV1S30\*01, IGKV1S31\*01, IGKV1S32\*01, IGKV1S33\*01, IGKV1S34\*01, IGKV1S35\*01,  
IGKV1S36\*01, IGKV1S37\*01, IGKV1S39\*01, IGKV1S4\*01, IGKV1S40\*01, IGKV1S41\*01, IGKV1S42\*01,  
IGKV1S44\*01, IGKV1S45\*01, IGKV1S46\*01, IGKV1S47\*01, IGKV1S48\*01, IGKV1S49\*01, IGKV1S5\*01,  
IGKV1S50\*01, IGKV1S51\*01, IGKV1S52\*01, IGKV1S53\*01, IGKV1S54\*01, IGKV1S55\*01, IGKV1S56\*01,  
IGKV1S57\*01, IGKV1S58\*01, IGKV1S59\*01, IGKV1S6\*01, IGKV1S60\*01, IGKV1S61\*01, IGKV1S62\*01,  
IGKV1S63\*01, IGKV1S64\*01, IGKV1S65\*01, IGKV1S66\*01, IGKV1S67\*01, IGKV1S68\*01, IGKV1S7\*01,  
IGKV1S8\*01 IGKV1S9\*01

**IGJH/K:**

IGHJ1\*01, IGHJ2\*01, IGHJ3\*01, IGHJ4\*01, IGHJ5\*01, IGHJ6\*01 and IGKJ1-2\*01

**Table 3.** Full list of IGVH germline gene usage observed in the samples analyzed.

| Gene | BM     |       | SP     |       | IM     |       |
|------|--------|-------|--------|-------|--------|-------|
|      | Counts | %     | Counts | %     | Counts | %     |
| 1S40 | 150266 | 58.19 | 180059 | 58.87 | 97162  | 32.32 |
| 1S45 | 85033  | 32.93 | 109673 | 35.86 | 68549  | 22.80 |
| 1S43 | 8261   | 3.20  | 7946   | 2.60  | 3047   | 1.01  |
| 1S47 | 7815   | 3.03  | 6048   | 1.98  | 2767   | 0.92  |
| 1S7  | 5814   | 2.25  | 883    | 0.29  | 1047   | 0.35  |
| 1S44 | 494    | 0.19  | 225    | 0.07  | 6172   | 2.05  |
| 1S8  | 203    | 0.08  | 44     | 0.01  | 50     | 0.02  |
| 1S33 | 125    | 0.05  | 386    | 0.13  | 41     | 0.01  |
| 1S28 | 90     | 0.03  | 302    | 0.10  | 82     | 0.03  |
| 1S69 | 37     | 0.01  | 156    | 0.05  | 121193 | 40.31 |
| 1S36 | 34     | 0.01  | 46     | 0.02  | 203    | 0.07  |
| 1S25 | 25     | 0.01  | 19     | 0.01  | 213    | 0.07  |
| 1S17 | 11     | 0.00  | 11     | 0.00  | 50     | 0.02  |
| 1S54 | 7      | 0.00  | 20     | 0.01  | 33     | 0.01  |
| 1S24 | 5      | 0.00  | 2      | 0.00  | 4      | 0.00  |
| 1S64 | 2      | 0.00  | 4      | 0.00  | 18     | 0.01  |
| 1S50 | 1      | 0.00  | 0      | 0.00  | 0      | 0.00  |
| 1S1  | 0      | 0.00  | 0      | 0.00  | 1      | 0.00  |
| 1S13 | 0      | 0.00  | 2      | 0.00  | 18     | 0.01  |
| 1S26 | 0      | 0.00  | 0      | 0.00  | 9      | 0.00  |
| 1S31 | 0      | 0.00  | 4      | 0.00  | 5      | 0.00  |
| 1S34 | 0      | 0.00  | 12     | 0.00  | 3      | 0.00  |
| 1S53 | 0      | 0.00  | 3      | 0.00  | 1      | 0.00  |
| 1S58 | 0      | 0.00  | 1      | 0.00  | 1      | 0.00  |

**Table 4.** Full list of IGVK germline gene usage observed in the samples analyzed.

| Gene | BM     |       | SP     |       | IM     |       |
|------|--------|-------|--------|-------|--------|-------|
|      | Counts | %     | Counts | %     | Counts | %     |
| 1S10 | 5548   | 19.21 | 6947   | 15.77 | 4157   | 13.97 |
| 1S36 | 3699   | 12.81 | 4028   | 9.15  | 3620   | 12.16 |
| 1S1  | 3463   | 11.99 | 5273   | 11.97 | 1824   | 6.13  |
| 1S17 | 2014   | 6.98  | 1687   | 3.83  | 1414   | 4.75  |
| 1S34 | 1746   | 6.05  | 2268   | 5.15  | 1458   | 4.90  |
| 1S15 | 1410   | 4.88  | 3193   | 7.25  | 1739   | 5.84  |
| 1S42 | 1317   | 4.56  | 1777   | 4.04  | 980    | 3.29  |
| 1S52 | 1252   | 4.34  | 3538   | 8.03  | 3138   | 10.54 |
| 1S37 | 1066   | 3.69  | 987    | 2.24  | 1201   | 4.04  |
| 1S23 | 829    | 2.87  | 2021   | 4.59  | 1396   | 4.69  |
| 1S4  | 762    | 2.64  | 1289   | 2.93  | 676    | 2.27  |
| 1S32 | 469    | 1.62  | 341    | 0.77  | 491    | 1.65  |
| 1S2  | 432    | 1.50  | 642    | 1.46  | 458    | 1.54  |
| 1S18 | 426    | 1.48  | 941    | 2.14  | 929    | 3.12  |
| 1S49 | 409    | 1.42  | 664    | 1.51  | 400    | 1.34  |
| 1S64 | 327    | 1.13  | 845    | 1.92  | 291    | 0.98  |
| 1S19 | 315    | 1.09  | 439    | 1.00  | 357    | 1.20  |
| 1S40 | 310    | 1.07  | 893    | 2.03  | 748    | 2.51  |
| 1S54 | 292    | 1.01  | 454    | 1.03  | 225    | 0.76  |
| 1S3  | 256    | 0.89  | 300    | 0.68  | 194    | 0.65  |
| 1S12 | 219    | 0.76  | 697    | 1.58  | 167    | 0.56  |
| 1S33 | 174    | 0.60  | 350    | 0.79  | 83     | 0.28  |
| 1S62 | 141    | 0.49  | 398    | 0.90  | 547    | 1.84  |
| 1S30 | 137    | 0.47  | 298    | 0.68  | 248    | 0.83  |
| 1S63 | 131    | 0.45  | 323    | 0.73  | 205    | 0.69  |
| 1S67 | 123    | 0.43  | 330    | 0.75  | 153    | 0.51  |
| 1S5  | 119    | 0.41  | 215    | 0.49  | 53     | 0.18  |
| 1S16 | 117    | 0.41  | 122    | 0.28  | 369    | 1.24  |
| 1S50 | 117    | 0.41  | 118    | 0.27  | 57     | 0.19  |
| 1S29 | 112    | 0.39  | 247    | 0.56  | 201    | 0.68  |
| 1S39 | 112    | 0.39  | 128    | 0.29  | 75     | 0.25  |
| 1S22 | 105    | 0.36  | 172    | 0.39  | 77     | 0.26  |
| 1S7  | 102    | 0.35  | 93     | 0.21  | 82     | 0.28  |
| 1S47 | 93     | 0.32  | 101    | 0.23  | 99     | 0.33  |
| 1S56 | 93     | 0.32  | 323    | 0.73  | 151    | 0.51  |
| 1S46 | 79     | 0.27  | 281    | 0.64  | 545    | 1.83  |
| 1S59 | 73     | 0.25  | 151    | 0.34  | 88     | 0.30  |
| 1S60 | 73     | 0.25  | 129    | 0.29  | 80     | 0.27  |
| 1S9  | 52     | 0.18  | 115    | 0.26  | 81     | 0.27  |

**IGVK**  
**(continued)**

| Gene | BM     |      | SP     |      | IM     |      |
|------|--------|------|--------|------|--------|------|
|      | Counts | %    | Counts | %    | Counts | %    |
| 1S55 | 35     | 0.12 | 68     | 0.15 | 16     | 0.05 |
| 1S53 | 34     | 0.12 | 128    | 0.29 | 48     | 0.16 |
| 1S58 | 32     | 0.11 | 61     | 0.14 | 33     | 0.11 |
| 1S31 | 30     | 0.10 | 55     | 0.12 | 15     | 0.05 |
| 1S6  | 29     | 0.10 | 73     | 0.17 | 24     | 0.08 |
| 1S44 | 27     | 0.09 | 52     | 0.12 | 38     | 0.13 |
| 1S68 | 27     | 0.09 | 100    | 0.23 | 94     | 0.32 |
| 1S27 | 21     | 0.07 | 36     | 0.08 | 54     | 0.18 |
| 1S48 | 15     | 0.05 | 50     | 0.11 | 67     | 0.23 |
| 1S41 | 14     | 0.05 | 36     | 0.08 | 35     | 0.12 |
| 1S14 | 13     | 0.05 | 40     | 0.09 | 19     | 0.06 |
| 1S26 | 12     | 0.04 | 5      | 0.01 | 1      | 0.00 |
| 1S20 | 6      | 0.02 | 60     | 0.14 | 15     | 0.05 |
| 1S51 | 6      | 0.02 | 3      | 0.01 | 1      | 0.00 |
| 1S8  | 4      | 0.01 | 8      | 0.02 | 7      | 0.02 |
| 1S25 | 2      | 0.01 | 2      | 0.00 | 6      | 0.02 |
| 1S65 | 2      | 0.01 | 2      | 0.00 | 0      | 0.00 |
| 1S28 | 1      | 0.00 | 0      | 0.00 | 0      | 0.00 |
| 1S21 | 0      | 0.00 | 0      | 0.00 | 17     | 0.06 |
| 1S24 | 0      | 0.00 | 1      | 0.00 | 1      | 0.00 |
| 1S35 | 0      | 0.00 | 0      | 0.00 | 2      | 0.01 |
| 1S66 | 0      | 0.00 | 3      | 0.01 | 1      | 0.00 |

**Table 5.** Ranking of CDR-H3 sequences based on the frequency of the germline gene – CDR-H3 sequence combination. Highlighted in orange is the germline gene – CDR-H3 combination identical to that of a hybridoma derived antibody.

| <b>Ranking</b> | <b>Germline gene – CDR-H3</b>   | <b>BM</b> | <b>SP</b> | <b>IM</b>   |
|----------------|---------------------------------|-----------|-----------|-------------|
| 1              | IGHV1S40_CARGGDLW               | 1         | 1         | 3665        |
| 2              | IGHV1S69_CARKAVASGYSFDIW        |           |           | 3660        |
| 3              | IGHV1S69_CASGIDGYRNIW           |           |           | 3297        |
| 4              | IGHV1S45_CARKNNYNYYPYNFW        |           |           | 3292        |
| 5              | IGHV1S69_CARGYTDYLHIW           |           |           | 2375        |
| 6              | IGHV1S69_CGRGVPGGNDGDGIW        |           |           | 2242        |
| 7              | IGHV1S69_CARKAVASGYTFDIW        |           |           | 2147        |
| 8              | IGHV1S69_CARAYDDGDADFDPW        |           |           | 1899        |
| 9              | IGHV1S45_CAKSAAYVDGGSPYATDGFDPW |           |           | 1744        |
| <b>10</b>      | <b>IGHV1S40_CARNVGYNTWDLW</b>   |           |           | <b>1559</b> |
| 11             | IGHV1S45_CARKNNYNYYPYNLW        |           |           | 1539        |
| 12             | IGHV1S40_CARSYNDYDGFYFNLW       |           |           | 1486        |
| 13             | IGHV1S69_CARGSHIKSAMDIA         |           |           | 1454        |
| 14             | IGHV1S69_CARYSNDYMGFNIW         |           |           | 1367        |
| 15             | IGHV1S45_CARDQYGVSSGYHLYYFDLW   |           |           | 1267        |

**Table 6.** Primers used to amplify the VH and VL repertoire of the BM, SP and IM samples. The primers were designed and validated by Rader et al., 2000. In red semi-degenerated positions – see code below.

**RHFabVk1 (Primer 21)**

5'GGGCCAGGCGGCCGAGCTCGTGMTGACCCAGACTCCA3'

**RHFabVk2 (Primer 22)**

5'GGGCCAGGCGGCCGAGCTCGATMTGACCCAGACTCCA3'

**rhfabvk3 (Primer 23)**

5'AGATGGTGCAGCCACAGTTCGTTTGATTCCACATTGGTGCC3'

**rhfabvk4 (Primer 24)**

5'AGATGGTGCAGCCACAGTTCGTAGGATCTCCAGCTCGGTCCC3'

**rhfabvk5 (Primer 25)**

5'AGATGGTGCAGCCACAGTTCGTTTGACACCACCTCGGTCCC3'

**RHFabVH1 (Primers 26-27)**

5'GCTGCCAAC CAGCCATGGCCAGTCGGTGGAGGAGTCC**R**GG3'

**RHFabVH2 (Primer 28)**

5'GCTGCCAACACCAGCCATGGCCAGTCGGTGAAGGAGTCCGAG3'

**RHFabVH3 (Primers 29-30)**

5'GCTGCCAACACCAGCCATGGCCAGTCG**Y**TGGAGGAGTCCGGG3'

**RHFabVH4 (Primers 31-32-33-34)**

5'GCTGCCAACACCAGCCATGGCCAG**S**AGCAGCTG**R**TGGAGTCCGG3'

**rhfabvh5 (Primers 35-36-37-38)**

5'CGATGGGCCCTTGGTGGAGGCTG**R**GAG**A**YGGTGACCAAGGGTGCC3'

Nucleotide code: R; A or G / S; G or C / Y; C or T



**Figure S1.** Amino acid composition of most frequently used CDR-H3 and CDR-L3 lengths. Only three representative lengths (10 – 12 amino acids; top to bottom) for VH and VL are shown. BM sample is shown on the left, SP in the middle and IM on the right. The composition for the remaining lengths will be provided upon request to the corresponding author.

**VH**

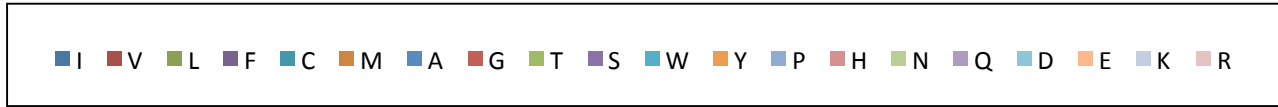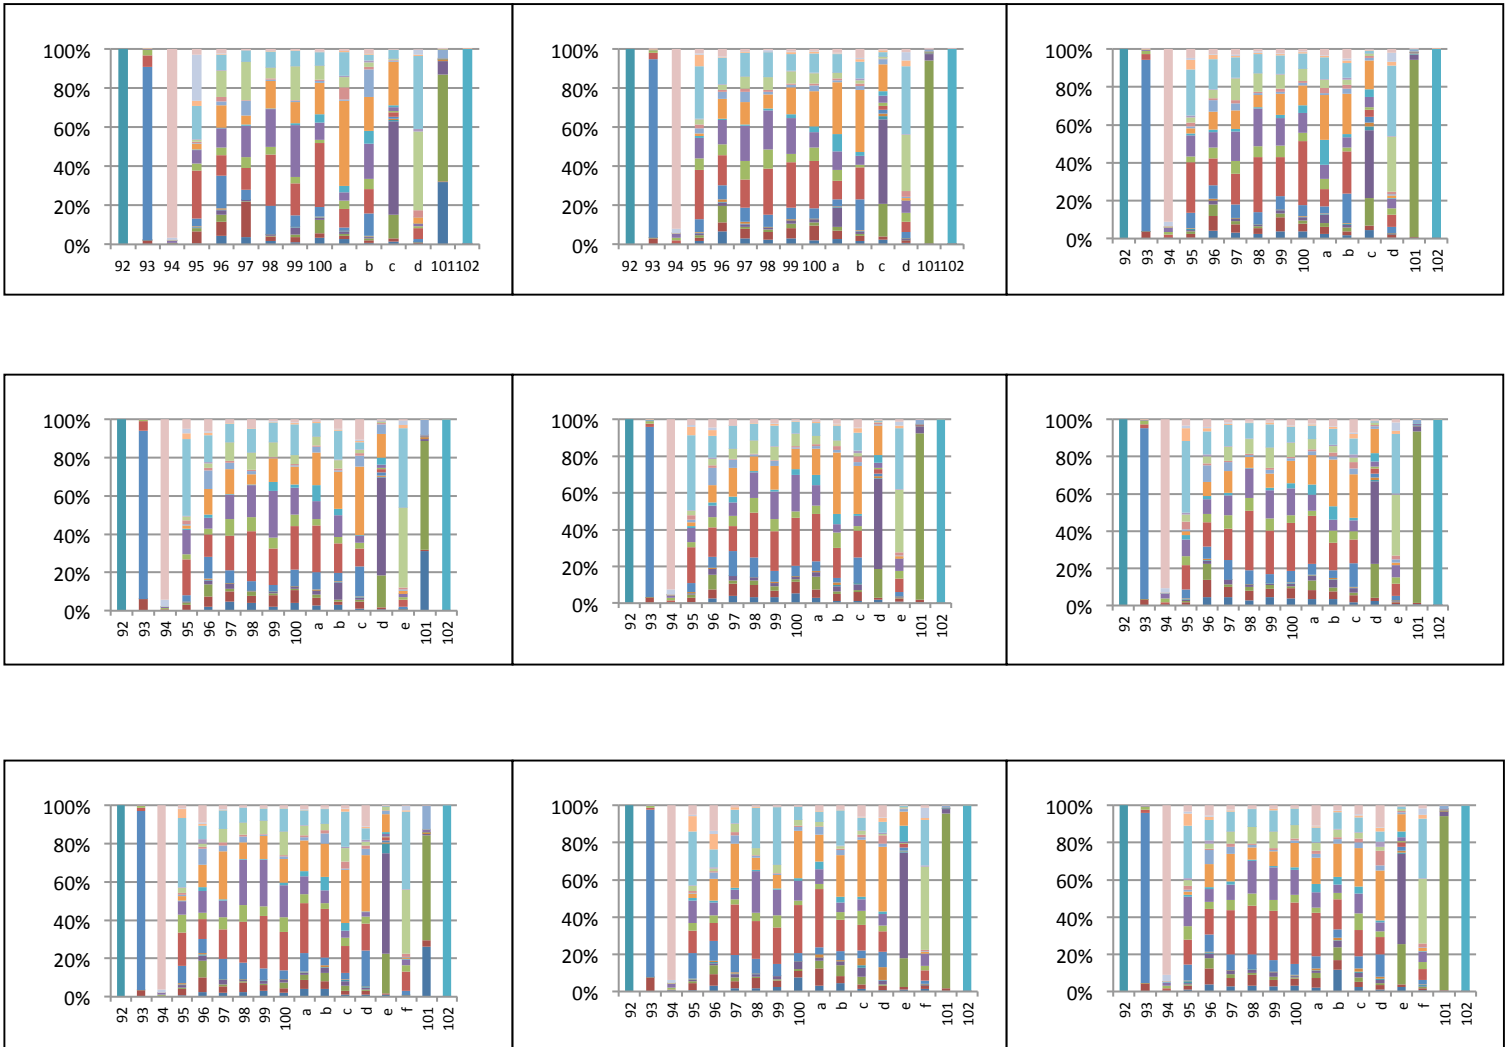

# VK

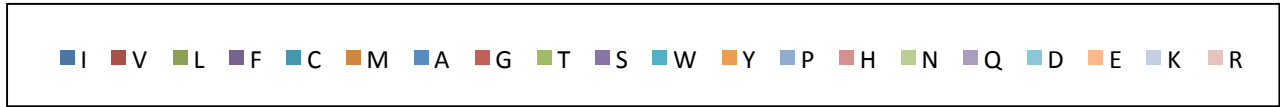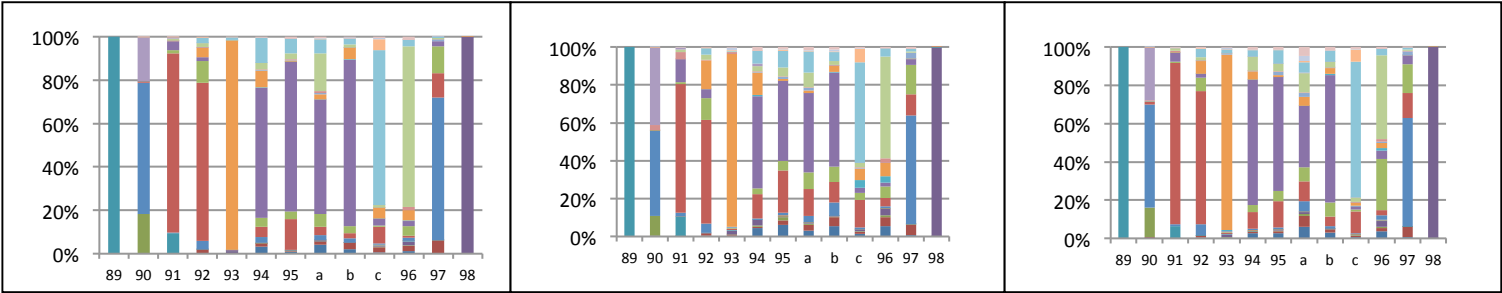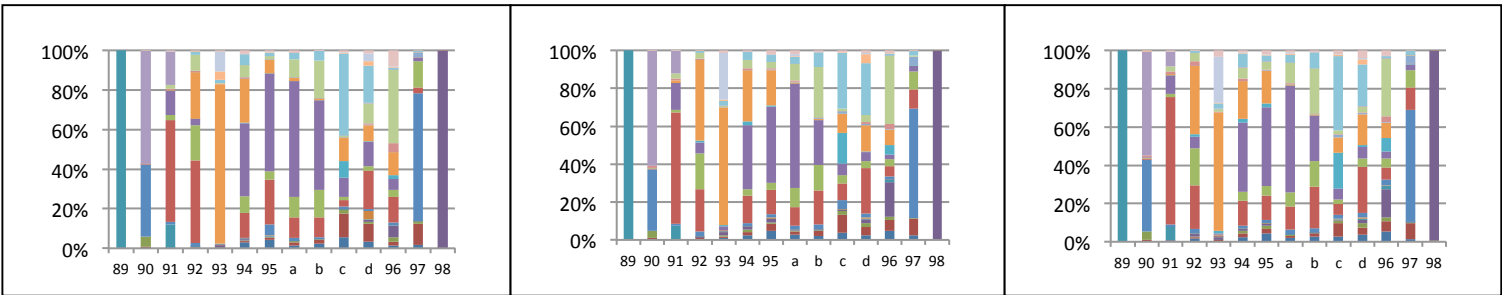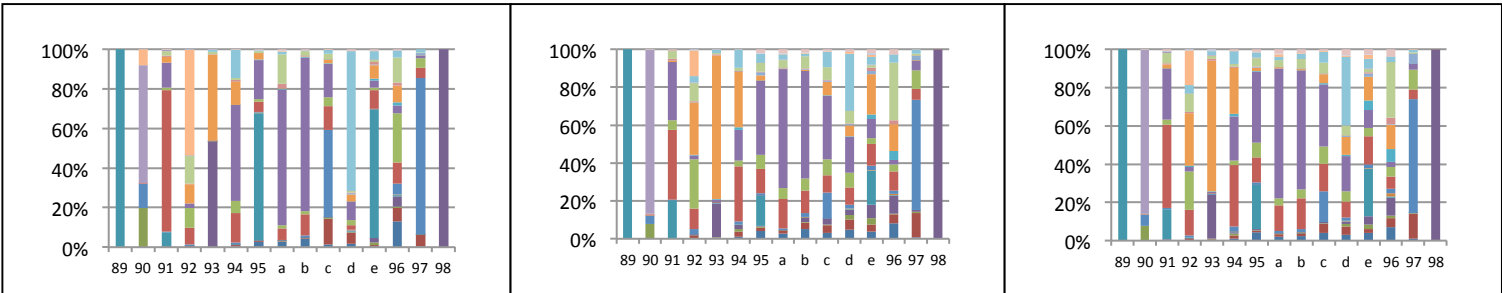

**Figure S2.** Alignment of 28-8 V regions with putative germline genes. Amino acid residues different from the germline are marked by vertical bars. An asterisk shows the mutation in the Cys residue at the CDR-L3.

## VH

**28-8** QSLEESGGDLVKPGASLTLTCTASGFSFSSNYMCWVRQAPGKGLEWIGCIYGGSSGST

**1S40/4** QSLEESGGDLVKPGASLTLTCTASGFSFSSSYMCWVRQAPGKGLEWIACIYAGSSGST

**28-8** YYASWAKGRFTISKISSTTVTLQVTSLSLAADTATYFCARNVGYNTWDLWGPATLVTVSS

**1S40/4** YYASWAKGRFTISKTSSTTVTLQMTSLTAADTATYFCAR-----YFNLWGPGLTIVTVSS

## VL

**1S41/1** AAVLTQTPSPVSVAVGGTVTINCQASQSVYNNNYLAWFQQKPGQPPKLLIYSASTL

**28-8** AAVLTQTPSPVSAAVGGTVTINCQASQSVYNNKNFAWYQQKPGQPPKLLIYEASTL

**1S18/1** AAVMTQTPSPVSVAVGGTVTINCQASQSVYNNNYLAWFQQKPGQPPKLLIYSASTL

**1S41/1** ASGVSSRFKGS GSGTQFTLTISGVQCDDAATYYCLGEFSCSSADC-AAFGGGTEVVVK

**28-8** ASGVPSRFKGS GSGTQFTLTISGVQCDDAATYYCLGEFTCSSADC-AAFGGGTEVVVK

**1S18/1** ASGVSSRFKGS GSGTQFTLTISGVQCDDAATYYCLGEFSSSSADCYNAFGGGTEVVVK
